# Supplementary material for: Anti-Fibrotic and Anti-Angiogenic Activities of Osbeckia octandra Leaf Extracts in Thioacetamide-Induced Experimental Liver Cirrhosis
Source: MDPI journal article supplement (doi:10.3390/molecules26164836), 2021-08-10
Supplement: s1 [file s1]

**Table S1:** Qualitative analysis of phytochemicals for different extracts of *O.octandra* leaves

| Chemical Test       | BLE | SLE | MLE | HLE |
|---------------------|-----|-----|-----|-----|
| Phenols and tannins | +   | +   | +   | +   |
| Flavonoids          | +   | +   | +   | +   |
| Steroids            | +   | +   | +   | +   |
| Alkaloids           | +   | +   | +   | +   |
| Terpenoids          | +   | +   | nd  | nd  |

Presence of relevant phytochemical marked as + and absence marked as nd

**Table S2:** Effect of CLS (crude leaves suspension) on body weight, organ weight and serum parameters.

| Parameter (mg/kg BW) | Con                        | 250                        | 500                        | 1,000                      | p value |
|----------------------|----------------------------|----------------------------|----------------------------|----------------------------|---------|
| BW gain (g)          | 96.80 ± 5.18 <sup>ab</sup> | 108.00 ± 2.88 <sup>a</sup> | 92.85 ± 5.24 <sup>ab</sup> | 80.00 ± 3.62 <sup>b</sup>  | 0.003   |
| Liver Index (%)      | 12.03 ± 0.16 <sup>a</sup>  | 11.60 ± 0.28 <sup>a</sup>  | 11.76 ± 0.19 <sup>a</sup>  | 11.83 ± 0.19 <sup>a</sup>  | 0.474   |
| Kidney weight(g)     | 1.07 ± 0.02 <sup>b</sup>   | 1.26 ± 0.04 <sup>ab</sup>  | 1.13 ± 0.03 <sup>ab</sup>  | 1.32 ± 0.08 <sup>a</sup>   | 0.009   |
| Spleen weight (g)    | 1.05 ± 0.27 <sup>b</sup>   | 1.08 ± 0.32 <sup>b</sup>   | 1.55 ± 0.07 <sup>a</sup>   | 1.69 ± 0.11 <sup>a</sup>   | 0.000   |
| Lung weight (g)      | 1.63 ± 0.11 <sup>a</sup>   | 1.47 ± 0.12 <sup>a</sup>   | 1.37 ± 0.05 <sup>a</sup>   | 1.31 ± 0.07 <sup>a</sup>   | 0.112   |
| ALT (U/L)            | 102.56 ± 4.33 <sup>a</sup> | 94.40 ± 2.27 <sup>a</sup>  | 97.18 ± 5.28 <sup>a</sup>  | 97.48 ± 4.26 <sup>a</sup>  | 0.588   |
| AST (U/L)            | 119.40 ± 2.69 <sup>a</sup> | 92.40 ± 6.28 <sup>a</sup>  | 102.40 ± 9.37 <sup>a</sup> | 109.60 ± 8.45 <sup>a</sup> | 0.094   |

Values are expressed in mean ± SEM, n=5, Statistically significant from control p<0.05. Different letters denote significant difference at (p<0.05)

**Table S3:** Effect size analysis

| Parameter        | Group comparisons | Cohen's d <sub>s</sub> | Hedges's g <sub>s</sub> | Eta squared | Omega squared |
|------------------|-------------------|------------------------|-------------------------|-------------|---------------|
| Body Weight Gain | HC vs DC          | -18.553                | -16.758                 | 0.944       | 0.990         |
|                  | DC vs CLS         | -17.274                | -15.602                 | 0.634       | 0.338         |
|                  | DC vs BLE         | -09.547                | -08.623                 | 0.771       | 0.068         |
|                  | DC vs SLE         | -06.092                | -05.502                 | 0.992       | 0.962         |
|                  | DC vs MLE         | -01.272                | -01.148                 | 0.453       | 0.768         |
|                  | DC vs HLE         | -00.472                | -00.427                 | 0.945       | 0.741         |
| Liver Index      | HC vs DC          | 12.185                 | 11.006                  | 0.951       | 0.561         |
|                  | DC vs CLS         | 09.924                 | 08.963                  | 0.583       | 2.059         |
|                  | DC vs BLE         | 08.431                 | 07.615                  | 0.954       | 0.779         |
|                  | DC vs SLE         | 07.319                 | 06.611                  | 0.904       | 0.561         |
|                  | DC vs MLE         | 00.920                 | 00.831                  | 0.679       | -0.216        |
|                  | DC vs HLE         | -16.532                | -14.932                 | 0.976       | 0.881         |
| Serum AST        | HC vs DC          | 13.251                 | 11.968                  | 0.969       | 0.849         |
|                  | DC vs CLS         | 10.360                 | 09.357                  | 0.982       | 0.914         |
|                  | DC vs BLE         | 07.402                 | 06.686                  | 0.998       | 0.990         |
|                  | DC vs SLE         | -16.532                | -14.932                 | 0.976       | 0.881         |
| ALT              | HC vs DC          | -18.038                | -16.292                 | 0.742       | -0.026        |

|                                            |           |         |         |       |        |
|--------------------------------------------|-----------|---------|---------|-------|--------|
|                                            | DC vs CLS | 21.344  | 19.278  | 0.944 | 0.735  |
|                                            | DC vs BLE | 19.963  | 18.031  | 0.154 | -1.291 |
|                                            | DC vs SLE | 16.180  | 14.614  | 0.951 | -0.027 |
| ALP                                        | HC vs DC  | -22.658 | -20.465 | 0.966 | 0.836  |
|                                            | DC vs CLS | 21.851  | 19.737  | 0.923 | 0.641  |
|                                            | DC vs BLE | 09.086  | 08.207  | 0.983 | 0.916  |
|                                            | DC vs SLE | 02.600  | 02.349  | 0.667 | -0.250 |
| Image J analysis                           | HC vs DC  | -08.997 | -08.127 | 0.375 | -0.923 |
|                                            | DC vs CLS | 08.036  | 07.258  | 0.984 | 0.921  |
|                                            | DC vs BLE | 06.710  | 06.061  | 0.908 | 0.577  |
|                                            | DC vs SLE | 04.475  | 04.042  | 0.074 | -1.403 |
|                                            | DC vs MLE | 00.013  | 00.012  | 0.958 | 0.799  |
|                                            | DC vs HLE | -00.663 | -00.599 | 0.679 | -0.216 |
| <i>Tnf-<math>\alpha</math>1</i> Expression | HC vs DC  | 01.610  | 01.454  | 0.444 | -0.087 |
|                                            | DC vs CLS | -00.643 | -00.580 | 0.103 | -0.549 |
|                                            | DC vs BLE | -01.345 | -01.214 | 0.667 | 0.286  |
|                                            | DC vs SLE | -00.775 | -00.700 | 0.615 | 0.194  |
| <i><math>\alpha</math>-Sma</i> Expression  | HC vs DC  | 09.228  | 08.335  | 0.986 | 0.943  |
|                                            | DC vs CLS | -02.160 | -01.951 | 0.141 | -0.848 |
|                                            | DC vs BLE | -03.391 | -03.063 | 0.971 | 0.887  |
|                                            | DC vs SLE | -01.499 | -01.354 | 0.998 | 0.994  |
| <i>Tgf-<math>\beta</math></i> Expression   | HC vs DC  | 06.928  | 06.258  | 0.151 | -0.324 |
|                                            | DC vs CLS | -04.893 | -04.420 | 0.056 | -0.436 |
|                                            | DC vs BLE | -06.943 | -06.271 | 0.906 | 0.817  |
|                                            | DC vs SLE | -06.310 | -05.699 | 0.059 | -0.432 |
| <i>Vegf-R2</i> Expression                  | HC vs DC  | 06.352  | 05.737  | 0.541 | 0.023  |
|                                            | DC vs CLS | -06.183 | -05.585 | 0.113 | -0.536 |
|                                            | DC vs BLE | -03.592 | -03.245 | 0.457 | -0.068 |
|                                            | DC vs SLE | -01.806 | -01.631 | 0.608 | 0.181  |

Interpretation of effect: Cohen's  $d$ s and Hedges'  $g$ s: 0.01; very small, 0.2; small, 0.5; medium; 0.8 large, 1.2; very large 2; huge. Eta squared and Omega squared: 0.01; small; 0.06 medium, 0.14 large

**Table S4:** Primers used for qPCR in this study

| Gene name                       | Forward Primer (3'-5')          | Reverse Primer (3'-5')         |
|---------------------------------|---------------------------------|--------------------------------|
| <i>Tnf-<math>\alpha</math>1</i> | GGC TGC CCC GAC TAT GTG         | CTC CTG GTA TGA AGT GGC AAA TC |
| <i>Tgf-<math>\beta</math></i>   | GAG GTG ACC TGG GCA CCA T       | GGC CAT GAG GAG CAG GAA        |
| <i><math>\alpha</math>-Sma</i>  | GAC CCT GAA GTA TCC GAT AGA ACA | CAC GCG AAG CTC GTT ATA GAA G  |
| <i>Vegf-R2</i>                  | CTG CCT ACC TCA CCT GTT TCC     | CGG CTC TTT CGC TTA CTG TTC    |
| 18S rRNA                        | GTA ACC CGT TGA ACC CCA TT      | CCA TCC AAT CGG TAG TAG CG     |

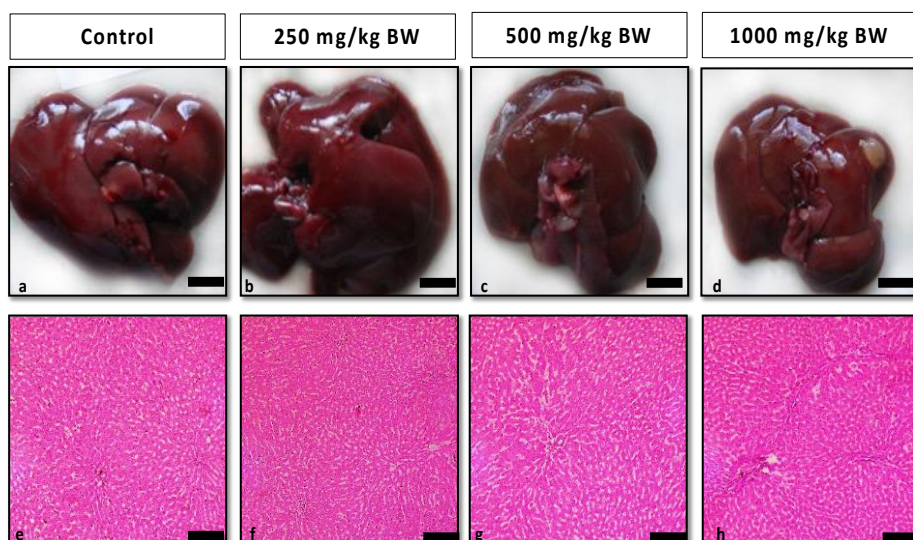

**Figure S1:** Administration of crude leaf suspension itself does not show any liver toxicities

Appearance of the control and different doses of CLS; 250 mg/kg body weight, 500 mg/kg body weight, 1000 mg/kg body weight, treated rat livers are shown. (a) Control group showed normal liver appearance. (b & c) 250 mg/kg body weight and 500 mg/kg body weight treated groups showed smooth liver surface similar to control group. (d) 1000 mg/kg body weight treated group showed small fat droplets in surface which were not prominent. Representative photographs are shown in scale bar = 10 mm. Histopathology by Hematoxylin and Eosin (H & E) stained liver sections of control and different doses of CLS; 250 mg/kg body weight, 500 mg/kg body weight and 1000 mg/kg body weight treated rat livers are shown. (e) Control group showed normal liver architecture. (f) 250 mg/kg body weight and (g) 500 mg/kg body weight treated groups showed normal hepatic architecture similar to control group. (h) 1000 mg/kg body weight showed initiation of ballooning degeneration. Representative photographs are shown in scale bar = 100  $\mu$ m.
